# Supplementary material for: Evaluation of a Heat Vulnerability Index on Abnormally Hot Days: An Environmental Public Health Tracking Study
Source: PubMed Central journal article supplement (PMC3346770; doi:10.1289/ehp.1103766), 2012-01-31
Supplement: ehp.1103766.s001.pdf [file ehp.1103766.s001.pdf]

## Supplemental Material

Title: “Evaluation of a Heat Vulnerability Index on Abnormally Hot Days: an Environmental Public Health Tracking Study”

### Authors:

Colleen E. Reid, Jennifer K. Mann, Ruth Alfasso, Paul B. English, Galatea C. King, Rebecca A. Lincoln, Helene G. Margolis, Dan J. Rubado, Joseph E. Sabato, Nancy L. West, Brian Woods, Kathleen M. Navarro, John R. Balmes

### Table of Contents:

|                                                                                                                                              |   |
|----------------------------------------------------------------------------------------------------------------------------------------------|---|
| Supplemental Material, Figure 1: Map of Study Zip Codes .....                                                                                | 2 |
| Supplemental Material, Table 1: Rate Ratios for a one-unit increase in HVI on non-deviant and deviant days.....                              | 3 |
| Supplemental Material, Table 2: Rate Ratios for a one-unit increase in HVI on non-extreme and extreme days.....                              | 4 |
| Supplemental Material, Table 3: Comparison of Rate Ratios for on Deviant and Extreme Day in Separate Models that Do Not Include the HVI..... | 5 |

# Supplemental Material, Figure 1: Map of Study Zip Codes

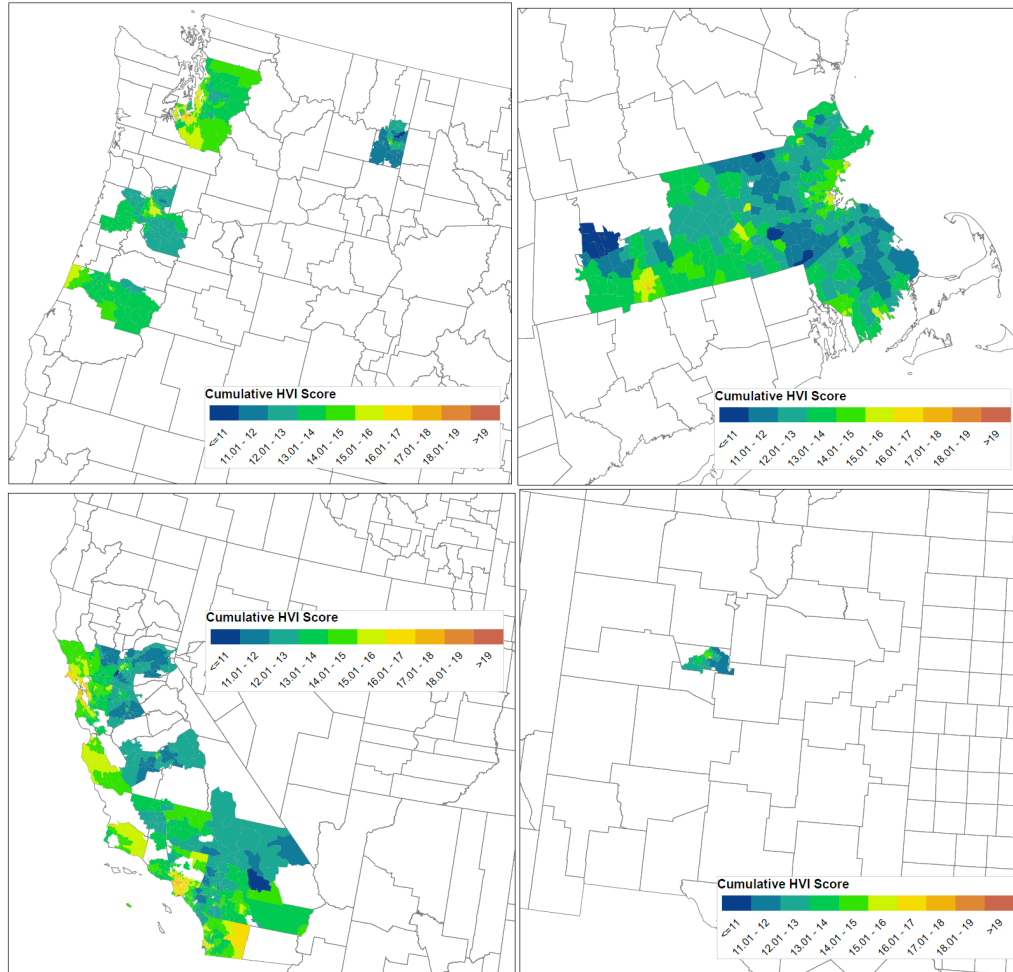

## Supplemental Material, Table 1: Rate Ratios for a one-unit increase in HVI on non-deviant and deviant days

|                                     | California      |                 | Massachusetts   |                 | New Mexico      |                 | Oregon          |                 | Washington      |                 |
|-------------------------------------|-----------------|-----------------|-----------------|-----------------|-----------------|-----------------|-----------------|-----------------|-----------------|-----------------|
|                                     | Non-Deviant day | Deviant day     | Non-Deviant day | Deviant day     | Non-Deviant day | Deviant day     | Non-Deviant day | Deviant day     | Non-Deviant day | Deviant day     |
| <i>Hospitalization</i>              |                 |                 |                 |                 |                 |                 |                 |                 |                 |                 |
| cerebrovascular                     | 1.09(1.07,1.11) | 1.10(1.08,1.12) | 1.07(1.04,1.10) | 1.07(1.03,1.10) | 1.11(1.01,1.22) | 1.20(0.96,1.50) | 1.05(0.99,1.11) | 1.09(1.00,1.18) | 1.11(1.08,1.15) | 1.12(1.08,1.17) |
| cardiovascular                      | 1.04(1.02,1.06) | 1.04(1.03,1.06) | 1.00(0.98,1.02) | 1.01(0.98,1.03) | 1.07(0.95,1.20) | 1.08(0.91,1.28) | 1.03(0.97,1.09) | 1.01(0.96,1.08) | 1.06(1.02,1.09) | 1.07(1.03,1.11) |
| electrolyte imbalance               | 1.09(1.07,1.11) | 1.10(1.08,1.12) | 1.08(1.05,1.11) | 1.10(1.07,1.13) | 1.14(1.06,1.22) | 1.18(1.05,1.32) | 1.11(1.06,1.15) | 1.11(1.06,1.17) | 1.13(1.09,1.17) | 1.14(1.09,1.18) |
| heat-related illness                | 0.94(0.90,0.97) | 1.11(1.05,1.17) | 1.11(1.01,1.21) | 1.26(1.10,1.44) | 1.10(0.58,2.10) | 0.41(0.25,0.66) | 1.15(0.93,1.44) | 1.12(0.88,1.44) | 0.91(0.80,1.04) | 1.22(0.95,1.56) |
| internal causes                     | 0.99(0.98,1.00) | 0.99(0.98,1.01) | 0.97(0.96,0.99) | 0.98(0.96,1.00) | 0.99(0.93,1.05) | 0.99(0.92,1.06) | 0.97(0.93,1.01) | 0.96(0.92,1.00) | 0.99(0.95,1.02) | 0.99(0.95,1.03) |
| nephritis and<br>nephrotic syndrome | 1.11(1.09,1.13) | 1.12(1.10,1.14) | 1.14(1.10,1.17) | 1.15(1.11,1.19) | 1.21(0.96,1.53) | 1.54(0.82,2.87) | 1.13(1.08,1.19) | 1.15(1.08,1.22) | 1.14(1.10,1.18) | 1.11(1.06,1.16) |
| renal failure                       | 1.11(1.09,1.13) | 1.13(1.11,1.15) | 1.15(1.11,1.19) | 1.17(1.12,1.22) | 1.21(1.11,1.32) | 1.19(0.98,1.45) | 1.16(1.10,1.22) | 1.19(1.12,1.27) | 1.15(1.11,1.19) | 1.14(1.08,1.20) |
| respiratory                         | 1.04(1.02,1.06) | 1.04(1.02,1.06) | 1.10(1.07,1.12) | 1.11(1.08,1.14) | 1.08(1.00,1.16) | 1.11(1.01,1.21) | 1.07(1.01,1.13) | 1.07(1.01,1.15) | 1.08(1.04,1.11) | 1.09(1.05,1.12) |
| <i>Mortality</i>                    |                 |                 |                 |                 |                 |                 |                 |                 |                 |                 |
| all-cause                           | 1.02(1.00,1.03) | 1.03(1.01,1.05) | 1.07(1.04,1.10) | 1.09(1.06,1.12) | 1.18(1.06,1.31) | 1.30(1.15,1.47) | 1.10(1.04,1.15) | 1.12(1.06,1.19) | 1.09(1.06,1.13) | 1.07(1.03,1.11) |
| cardiovascular                      | 1.03(1.01,1.05) | 1.04(1.02,1.06) | 1.08(1.05,1.11) | 1.08(1.04,1.13) | 1.20(1.05,1.36) | 1.40(1.12,1.76) | 1.12(1.06,1.19) | 1.14(1.07,1.22) | 1.13(1.09,1.17) | 1.05(1.00,1.11) |
| respiratory                         | 1.00(0.99,1.02) | 0.99(0.96,1.02) | 1.07(1.03,1.11) | 1.08(1.02,1.15) | 1.26(1.14,1.39) | 1.32(1.07,1.63) | 1.09(1.02,1.17) | 1.15(1.00,1.33) | 1.10(1.05,1.14) | 1.09(1.00,1.19) |

Models included the following variables: HVI, deviant day, the interaction between deviant day and the HVI 8-hour ozone, month and day of week.

## Supplemental Material, Table 2: Rate Ratios for a one-unit increase in HVI on non-extreme and extreme days

|                                  | California      |                 | Massachusetts   |                 | New Mexico      |                 | Oregon          |                 | Washington      |                 |
|----------------------------------|-----------------|-----------------|-----------------|-----------------|-----------------|-----------------|-----------------|-----------------|-----------------|-----------------|
|                                  | Non-extreme Day | Extreme Day     | Non-extreme Day | Extreme Day     | Non-extreme Day | Extreme Day     | Non-extreme Day | Extreme Day     | Non-extreme Day | Extreme Day     |
| <i>Hospitalizations</i>          |                 |                 |                 |                 |                 |                 |                 |                 |                 |                 |
| cerebrovascular                  | 1.09(1.07,1.11) | 1.09(1.08,1.11) | 1.07(1.04,1.09) | 1.08(1.05,1.12) | 1.12(1.01,1.23) | 1.09(0.90,1.33) | 1.05(0.99,1.12) | 1.06(0.98,1.15) | 1.11(1.08,1.15) | 1.11(1.07,1.16) |
| cardiovascular                   | 1.04(1.02,1.06) | 1.04(1.02,1.06) | 1.00(0.98,1.02) | 1.00(0.98,1.03) | 1.08(0.96,1.21) | 1.04(0.88,1.23) | 1.03(0.97,1.09) | 1.02(0.97,1.08) | 1.06(1.02,1.09) | 1.06(1.02,1.10) |
| electrolyte imbalance            | 1.09(1.07,1.11) | 1.09(1.07,1.11) | 1.08(1.05,1.11) | 1.09(1.06,1.12) | 1.14(1.06,1.22) | 1.20(1.08,1.33) | 1.11(1.06,1.15) | 1.10(1.05,1.16) | 1.13(1.09,1.17) | 1.14(1.10,1.18) |
| heat-related illness             | 0.94(0.90,0.97) | 1.13(1.07,1.19) | 1.09(0.98,1.20) | 1.21(1.07,1.37) | 1.02(0.57,1.82) | 1.17(0.28,4.82) | 1.16(0.93,1.44) | 1.19(0.90,1.56) | 0.96(0.83,1.11) | 1.03(0.84,1.27) |
| internal causes                  | 0.99(0.98,1.00) | 0.99(0.98,1.00) | 0.97(0.96,0.99) | 0.98(0.96,1.00) | 0.99(0.93,1.05) | 0.97(0.90,1.05) | 0.97(0.93,1.01) | 0.97(0.93,1.01) | 0.99(0.95,1.03) | 0.99(0.95,1.03) |
| nephritis and nephrotic syndrome | 1.11(1.09,1.12) | 1.11(1.09,1.13) | 1.13(1.10,1.17) | 1.17(1.13,1.21) | 1.21(0.96,1.53) | 1.37(0.78,2.40) | 1.13(1.08,1.19) | 1.13(1.06,1.19) | 1.13(1.10,1.17) | 1.13(1.08,1.19) |
| renal failure                    | 1.11(1.09,1.13) | 1.12(1.10,1.14) | 1.14(1.11,1.18) | 1.18(1.13,1.23) | 1.20(1.11,1.31) | 1.25(1.06,1.48) | 1.16(1.10,1.22) | 1.16(1.09,1.23) | 1.15(1.10,1.19) | 1.16(1.10,1.23) |
| respiratory                      | 1.04(1.02,1.06) | 1.04(1.02,1.06) | 1.10(1.07,1.12) | 1.11(1.08,1.13) | 1.08(1.00,1.16) | 1.06(1.00,1.13) | 1.07(1.01,1.13) | 1.06(1.00,1.13) | 1.08(1.04,1.11) | 1.09(1.05,1.13) |
| <i>Mortality</i>                 |                 |                 |                 |                 |                 |                 |                 |                 |                 |                 |
| all-cause                        | 1.02(1.00,1.03) | 1.02(1.01,1.04) | 1.07(1.04,1.10) | 1.08(1.05,1.12) | 1.19(1.07,1.32) | 1.13(1.01,1.27) | 1.10(1.04,1.15) | 1.12(1.06,1.19) | 1.09(1.06,1.13) | 1.08(1.04,1.12) |
| cardiovascular                   | 1.03(1.01,1.05) | 1.04(1.01,1.06) | 1.08(1.05,1.11) | 1.08(1.04,1.12) | 1.20(1.05,1.38) | 1.09(0.89,1.33) | 1.12(1.06,1.19) | 1.17(1.10,1.24) | 1.13(1.08,1.17) | 1.08(1.03,1.13) |
| respiratory                      | 1.00(0.98,1.02) | 1.01(0.98,1.04) | 1.07(1.03,1.11) | 1.08(1.02,1.15) | 1.27(1.16,1.40) | 1.15(0.77,1.72) | 1.09(1.02,1.16) | 1.20(1.05,1.38) | 1.10(1.06,1.14) | 1.07(0.98,1.17) |

**Supplemental Material, Table 3: Comparison of Rate Ratios for on Deviant and Extreme Day in Separate Models that Do Not Include the HVI**

|                                   | California      |                 | Massachusetts   |                 | New Mexico      |                 | Oregon          |                 | Washington      |                 |
|-----------------------------------|-----------------|-----------------|-----------------|-----------------|-----------------|-----------------|-----------------|-----------------|-----------------|-----------------|
|                                   | Deviant Day     | Extreme Day     | Deviant Day     | Extreme Day     | Deviant Day     | Extreme Day     | Deviant Day     | Extreme Day     | Deviant Day     | Extreme Day     |
| <i>Hospitalizations</i>           |                 |                 |                 |                 |                 |                 |                 |                 |                 |                 |
| cerebrovascular                   | 1.02(1.00,1.03) | 1.01(0.99,1.02) | 1.01(0.98,1.04) | 1.00(0.97,1.03) | 1.02(0.89,1.16) | 0.94(0.80,1.10) | 1.02(0.96,1.08) | 0.99(0.94,1.05) | 0.99(0.94,1.03) | 0.98(0.94,1.02) |
| cardiovascular                    | 1.00(0.99,1.01) | 1.00(1.00,1.01) | 1.01(1.00,1.02) | 1.01(1.00,1.02) | 1.02(0.95,1.09) | 0.96(0.89,1.03) | 1.04(1.01,1.07) | 1.04(1.02,1.07) | 1.02(0.99,1.04) | 1.02(1.00,1.04) |
| electrolyte imbalance             | 1.05(1.04,1.06) | 1.07(1.06,1.08) | 1.06(1.04,1.08) | 1.08(1.06,1.10) | 1.01(0.95,1.07) | 1.06(0.98,1.14) | 1.04(1.00,1.07) | 1.12(1.08,1.16) | 1.06(1.03,1.10) | 1.05(1.02,1.09) |
| heat-related illness              | 7.49(6.63,8.48) | 7.08(6.25,8.01) | 6.60(4.91,8.86) | 6.31(4.93,8.06) | 1.65(0.34,8.03) | 1.07(0.38,3.03) | 5.34(3.07,9.29) | 3.69(1.89,7.18) | 5.35(3.30,8.66) | 5.54(3.58,8.58) |
| internal causes                   | 1.00(1.00,1.00) | 1.01(1.00,1.01) | 1.01(1.00,1.01) | 1.01(1.00,1.02) | 1.03(1.00,1.06) | 1.01(0.99,1.04) | 1.02(1.01,1.04) | 1.04(1.03,1.06) | 1.01(1.00,1.02) | 1.02(1.01,1.03) |
| nephritis &<br>nephrotic syndrome | 1.07(1.06,1.09) | 1.13(1.11,1.15) | 1.10(1.07,1.13) | 1.05(1.02,1.08) | 0.83(0.58,1.19) | 0.96(0.60,1.56) | 1.03(0.98,1.09) | 0.99(0.94,1.04) | 1.05(1.00,1.10) | 1.02(0.98,1.06) |
| acute renal failure               | 1.07(1.05,1.09) | 1.13(1.11,1.15) | 1.07(1.04,1.11) | 1.06(1.02,1.10) | 1.01(0.88,1.16) | 1.23(1.11,1.35) | 1.02(0.95,1.10) | 1.05(0.98,1.11) | 1.07(1.01,1.14) | 1.06(1.01,1.11) |
| respiratory                       | 1.01(1.00,1.01) | 1.01(1.00,1.02) | 1.02(1.00,1.03) | 1.01(1.00,1.03) | 1.05(0.98,1.11) | 0.99(0.95,1.03) | 1.02(0.99,1.05) | 1.03(1.00,1.07) | 1.02(1.00,1.05) | 1.03(1.01,1.06) |
| <i>Mortality</i>                  |                 |                 |                 |                 |                 |                 |                 |                 |                 |                 |
| all-cause                         | 1.05(1.04,1.07) | 1.06(1.04,1.07) | 1.05(1.02,1.07) | 1.03(1.00,1.05) | 1.08(0.99,1.18) | 0.97(0.90,1.06) | 1.00(0.96,1.05) | 0.98(0.93,1.03) | 1.03(0.99,1.07) | 1.02(0.98,1.05) |
| cardiovascular                    | 1.06(1.04,1.09) | 1.06(1.03,1.08) | 1.04(0.99,1.09) | 1.03(0.99,1.07) | 1.00(0.85,1.16) | 1.04(0.89,1.23) | 0.98(0.89,1.08) | 0.94(0.86,1.02) | 1.07(1.01,1.15) | 1.00(0.95,1.06) |
| respiratory                       | 1.05(1.01,1.09) | 1.05(1.01,1.09) | 1.10(1.01,1.19) | 1.03(0.96,1.10) | 1.09(0.87,1.36) | 0.90(0.62,1.31) | 1.02(0.87,1.20) | 1.04(0.88,1.22) | 0.97(0.86,1.11) | 0.99(0.89,1.10) |
